# Supplementary material
Source: Elsevier journal article supplement (https://www.sciencedirect.com/science/article/pii/S0021755722000249)
Supplement: mmc1 [file S0021755722000249:mmc1.docx]

**JPED-D-21-00440_Supplementary Material**

**Table S1 - Predictors for IgAV at admission by logistic regression analysis.**

| Biomarker | B | OR | 95% CI | P |
| --- | --- | --- | --- | --- |
| IgA, g/L | 0.82 | 2.27 | 0.99-5.18 | 0.052 |
| IgM, g/L | 1.47 | 4.38 | 0.51-37.32 | 0.177 |
| SDC-1, ng/L | 0.07 | 1.08 | 1.03-1.12 | 0.001 |

IgAV, Immunoglobulin-A vasculitis; IgA, immunoglobulin A; SDC-1, syndecan-1; CI, confidence interval.

**Table S2 - Predictors for IgAV with** **gastrointestinal involvements at admission by logistic regression analysis.**

| Biomarker | B | OR | 95% CI | P |
| --- | --- | --- | --- | --- |
| SDC-1, ng/L | 0.03 | 1.03 | 1.008-1.052 | 0.007 |

IgAV, Immunoglobulin-A vasculitis; SDC-1, syndecan-1; OR, odds ratio; CI, confidence interval.
